# Supplementary material
Source: PubMed Central journal article supplement (PMC1595450)

## Glucose uptake

### 3T3-L1

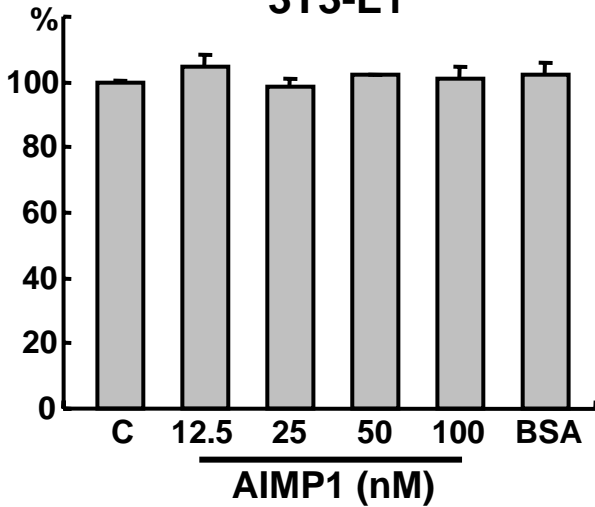

### C2C12

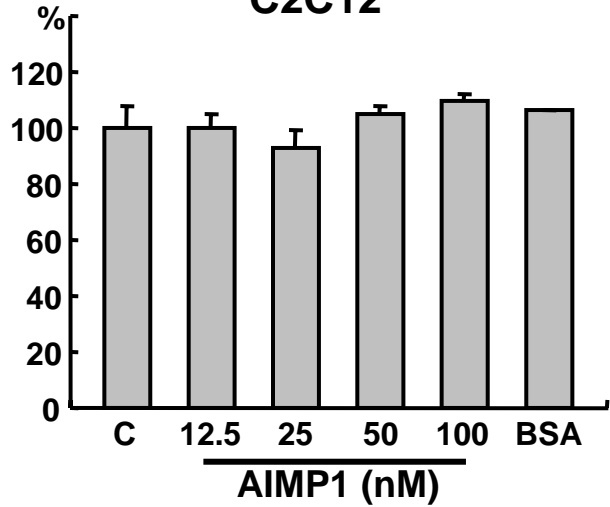

## Fatty acid uptake

### 3T3-L1

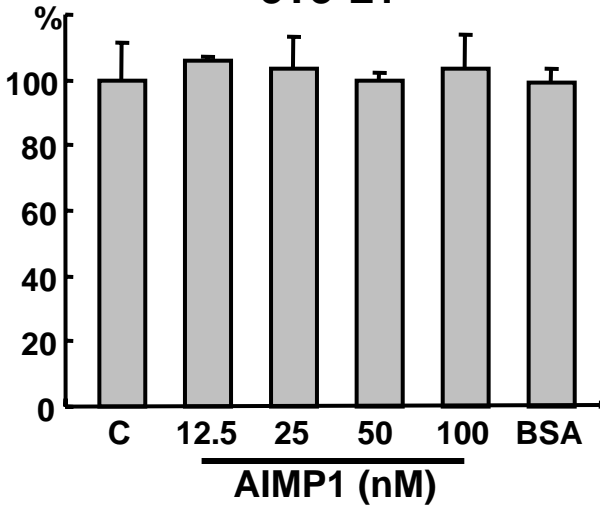

### C2C12

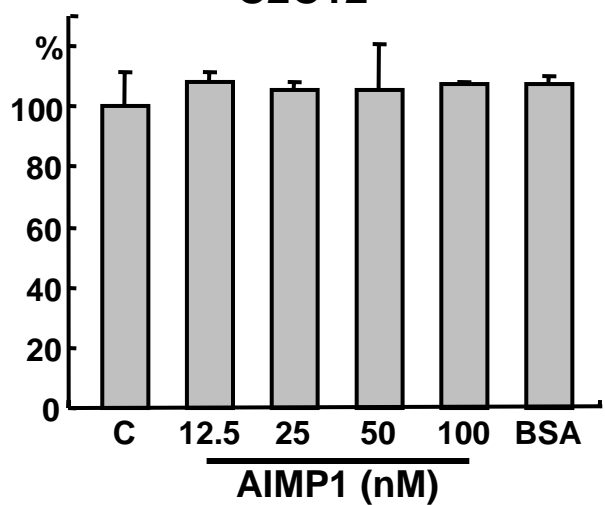

Supplement: pnas_0602045103_1.pdf [file pnas_0602045103_1.pdf]

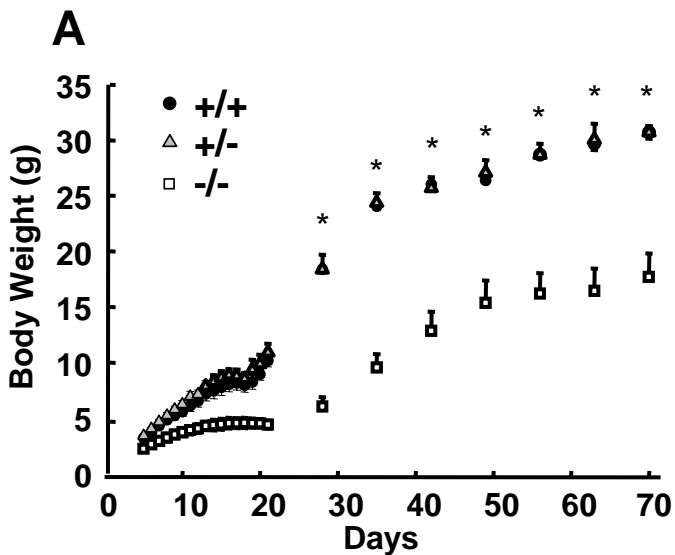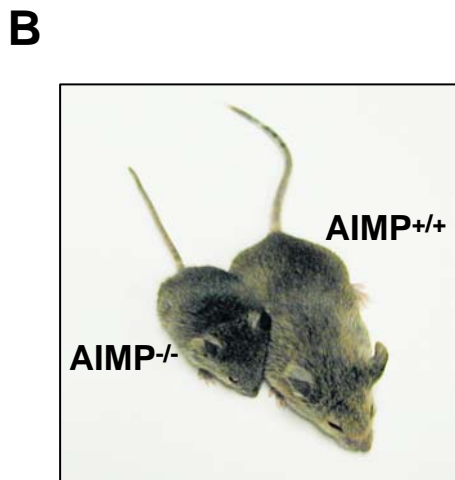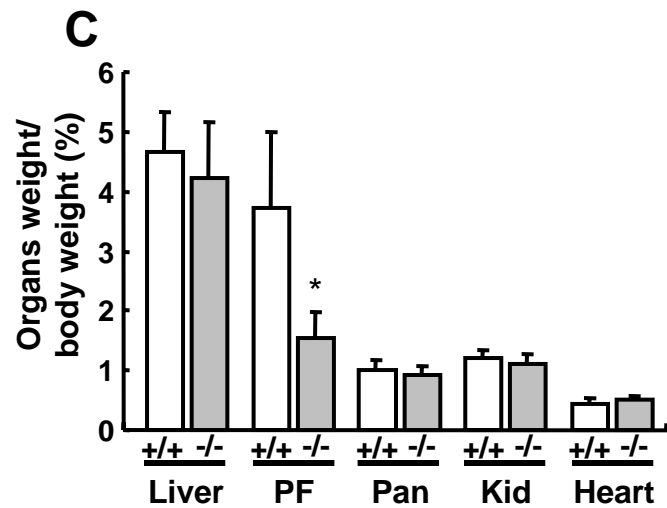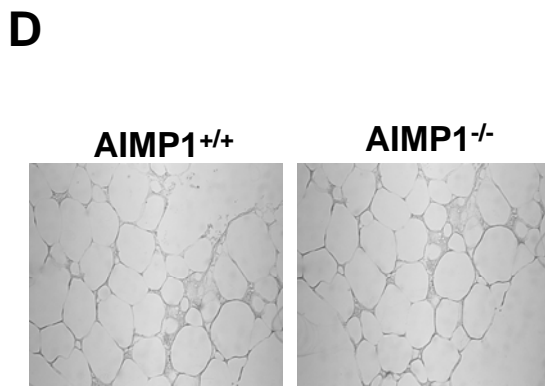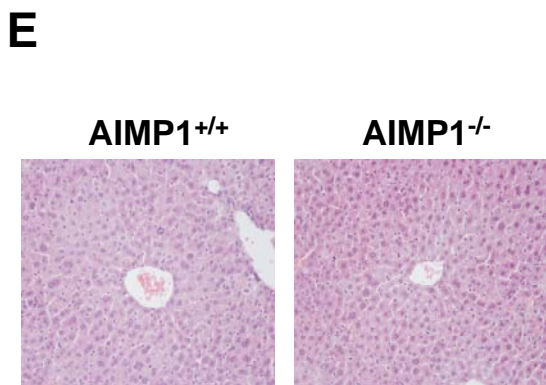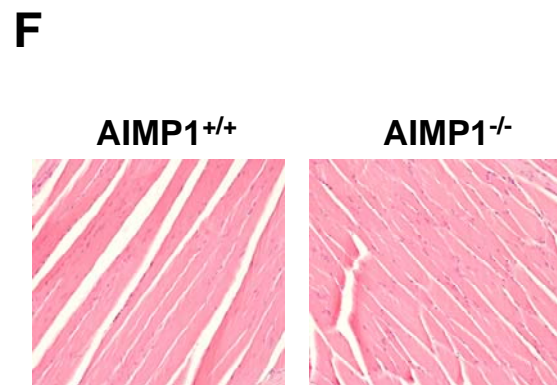

Supplement: pnas_0602045103_2.pdf [file pnas_0602045103_2.pdf]

**A**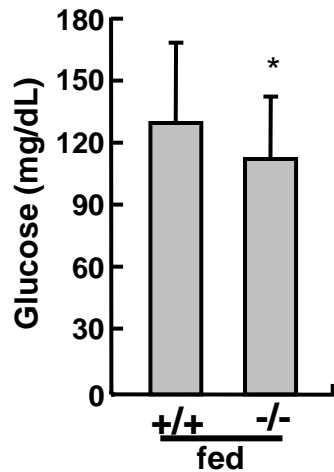**B**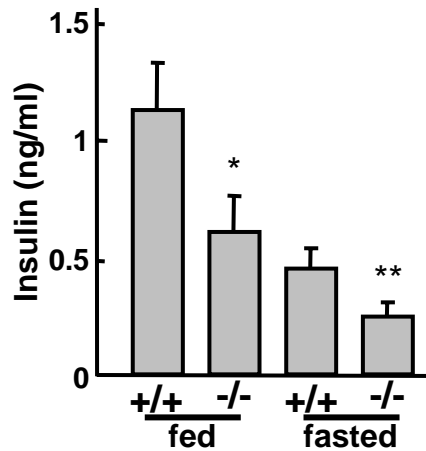**C**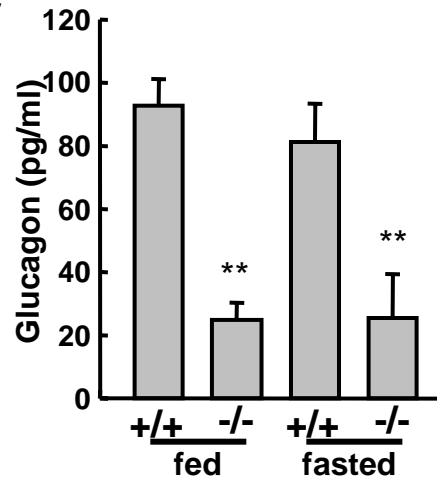**D**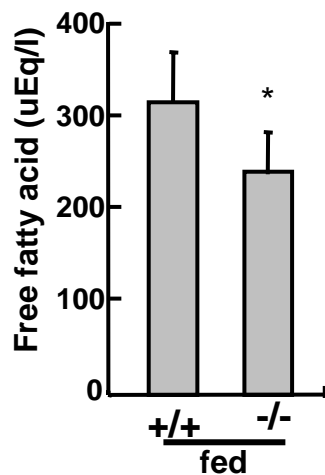**E**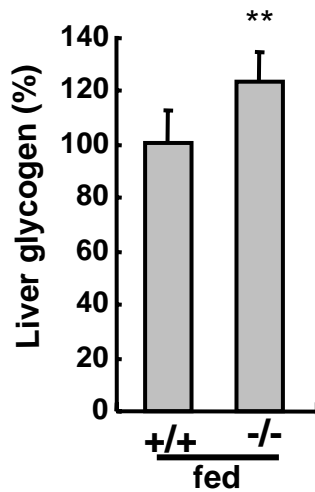

Supplement: pnas_0602045103_3.pdf [file pnas_0602045103_3.pdf]

**Glucagon**

**Insulin**

**AIMP<sup>+/+</sup>**

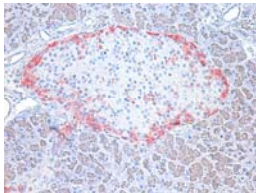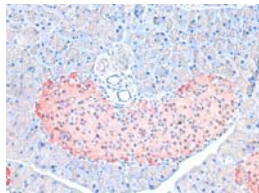

**AIMP<sup>-/-</sup>**

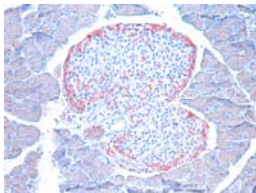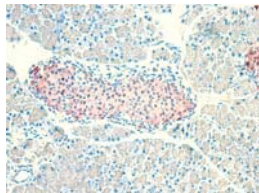

Supplement: pnas_0602045103_4.pdf [file pnas_0602045103_4.pdf]

**A**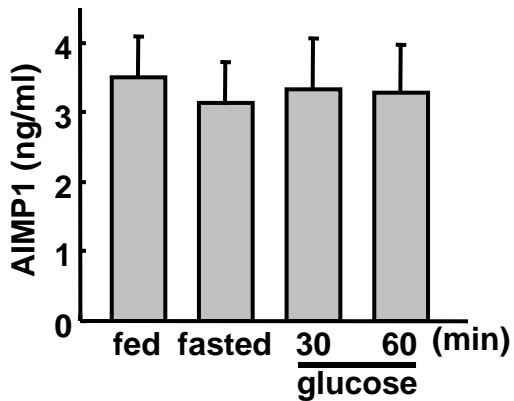**B**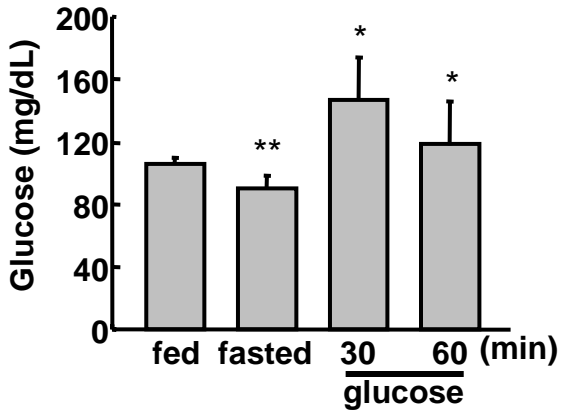

Supplement: pnas_0602045103_5.pdf [file pnas_0602045103_5.pdf]

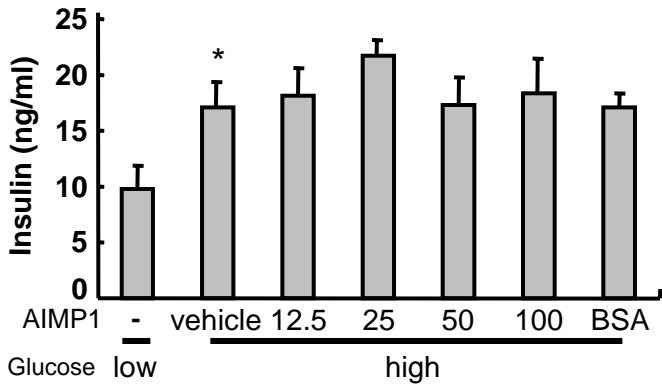

Supplement: pnas_0602045103_6.pdf [file pnas_0602045103_6.pdf]
